# Supplementary material
Source: publisher figshare collection journal article supplement (https://acs.figshare.com/ndownloader/files/19069064)
Supplement: Supplementary file 1 [file 19069064]

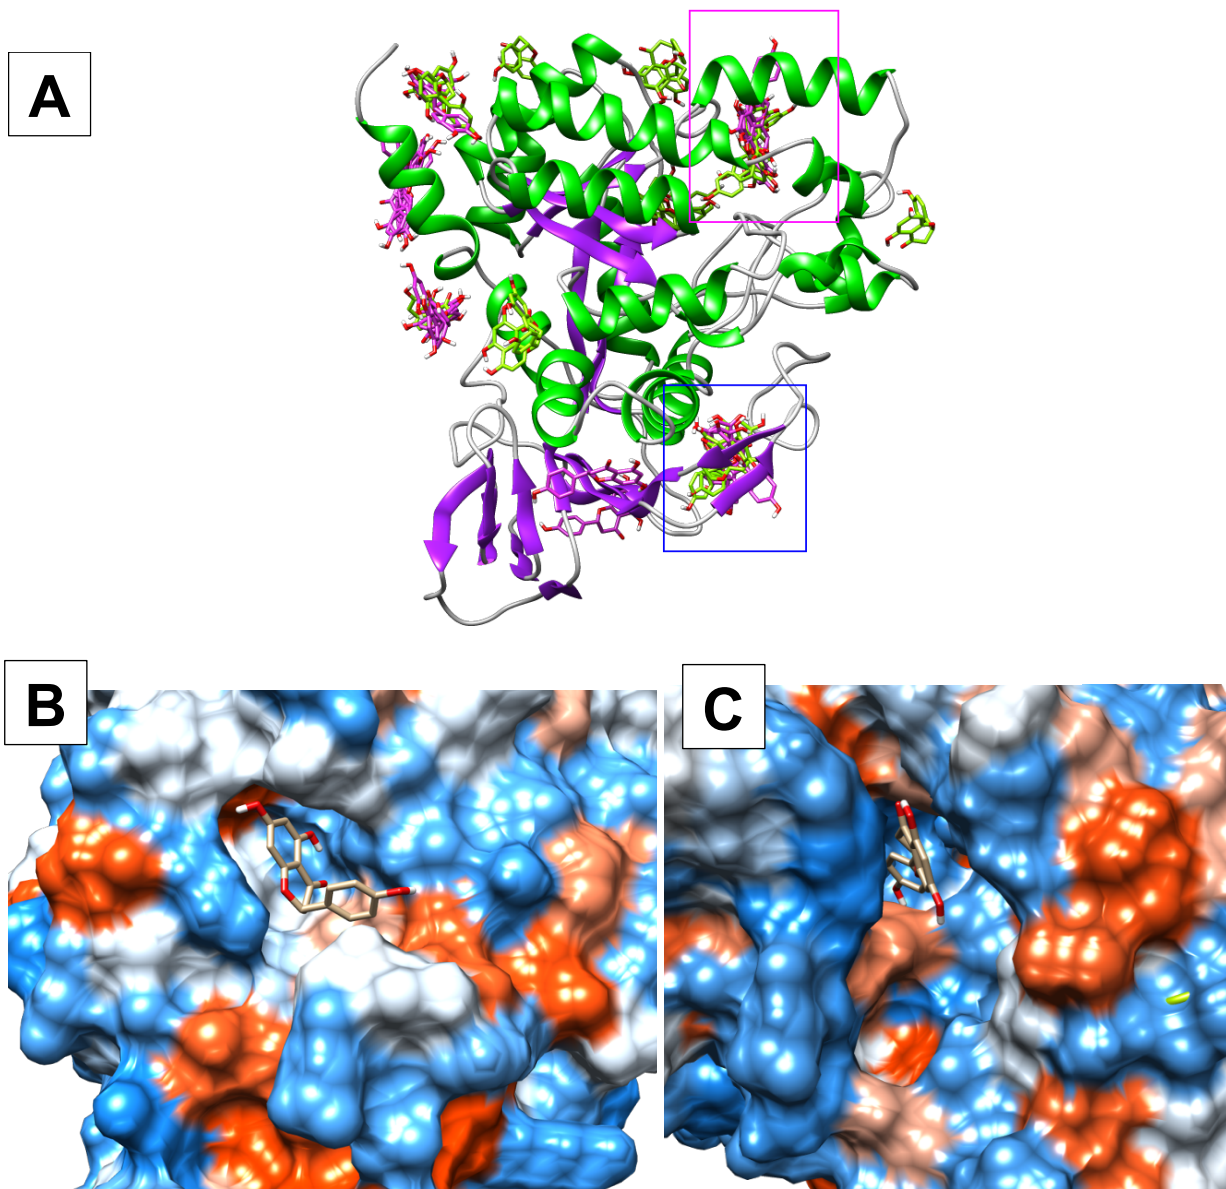

**Supplementary Figure 1. Docking of Naringenin onto CRMP2.** (A) Multiple docking poses of both Naringenin enantiomers on the CRMP-2. Naringenin is rendered as a capped stick in green (S-enantiomer) and magenta (R-enantiomer). (B) Naringenin in Lacosamide site. Hydrophobic character of the cavity is mapped onto the protein surface. White-gray – neutral, blue or orange are positively or negatively charged areas. (C) Naringenin in DHPase active site. Hydrophobic character of the cavity is mapped onto the protein surface. White-gray – neutral, blue or orange are positively or negatively charged areas.

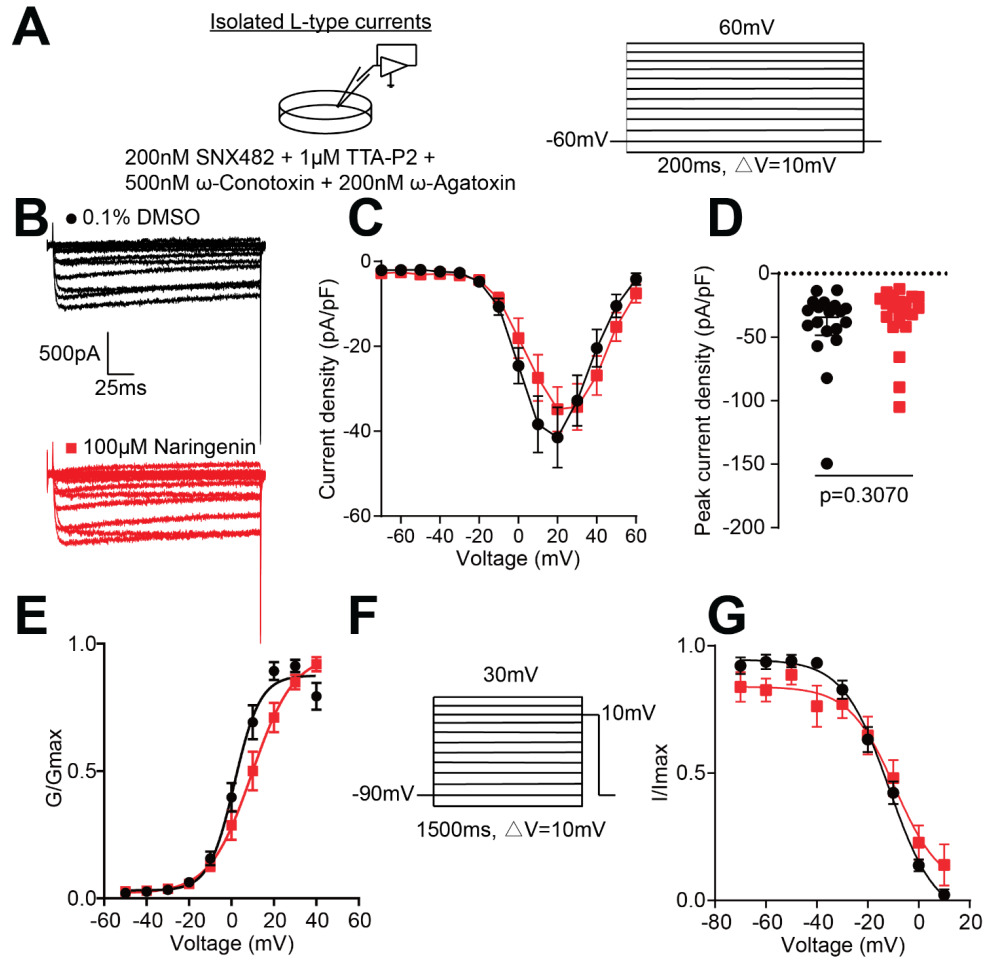

**Supplementary Figure 2. L-Type (CaV1.x) Ca<sup>2+</sup> currents in dorsal root ganglion (DRG) sensory neurons are not affected by Naringenin.** (A) Currents were isolated following the indicated protocol. (B) Representative traces of L-Type Ca<sup>2+</sup> currents from DRG sensory neurons treated with 0.1% DMSO (control) or 100 μM Naringenin. Summary of the normalized (pA/pF) L-Type calcium current density versus voltage relationship (C) and peak L-Type Ca<sup>2+</sup> current density at +20 mV (mean ± SEM) (D) from DRG sensory neurons treated as indicated. Boltzmann fits for normalized conductance G/G<sub>max</sub> voltage relations for voltage dependent activation (E) and using the voltage protocol in (F), inactivation (G) of sensory neurons treated as indicated. V<sub>0.5</sub> values for activation and inactivation are presented in Table 1. No statistical significance was detected compared with cells treated with 0.1% DMSO (p>0.05, Mann-Whitney, n=18-19 cells per condition).

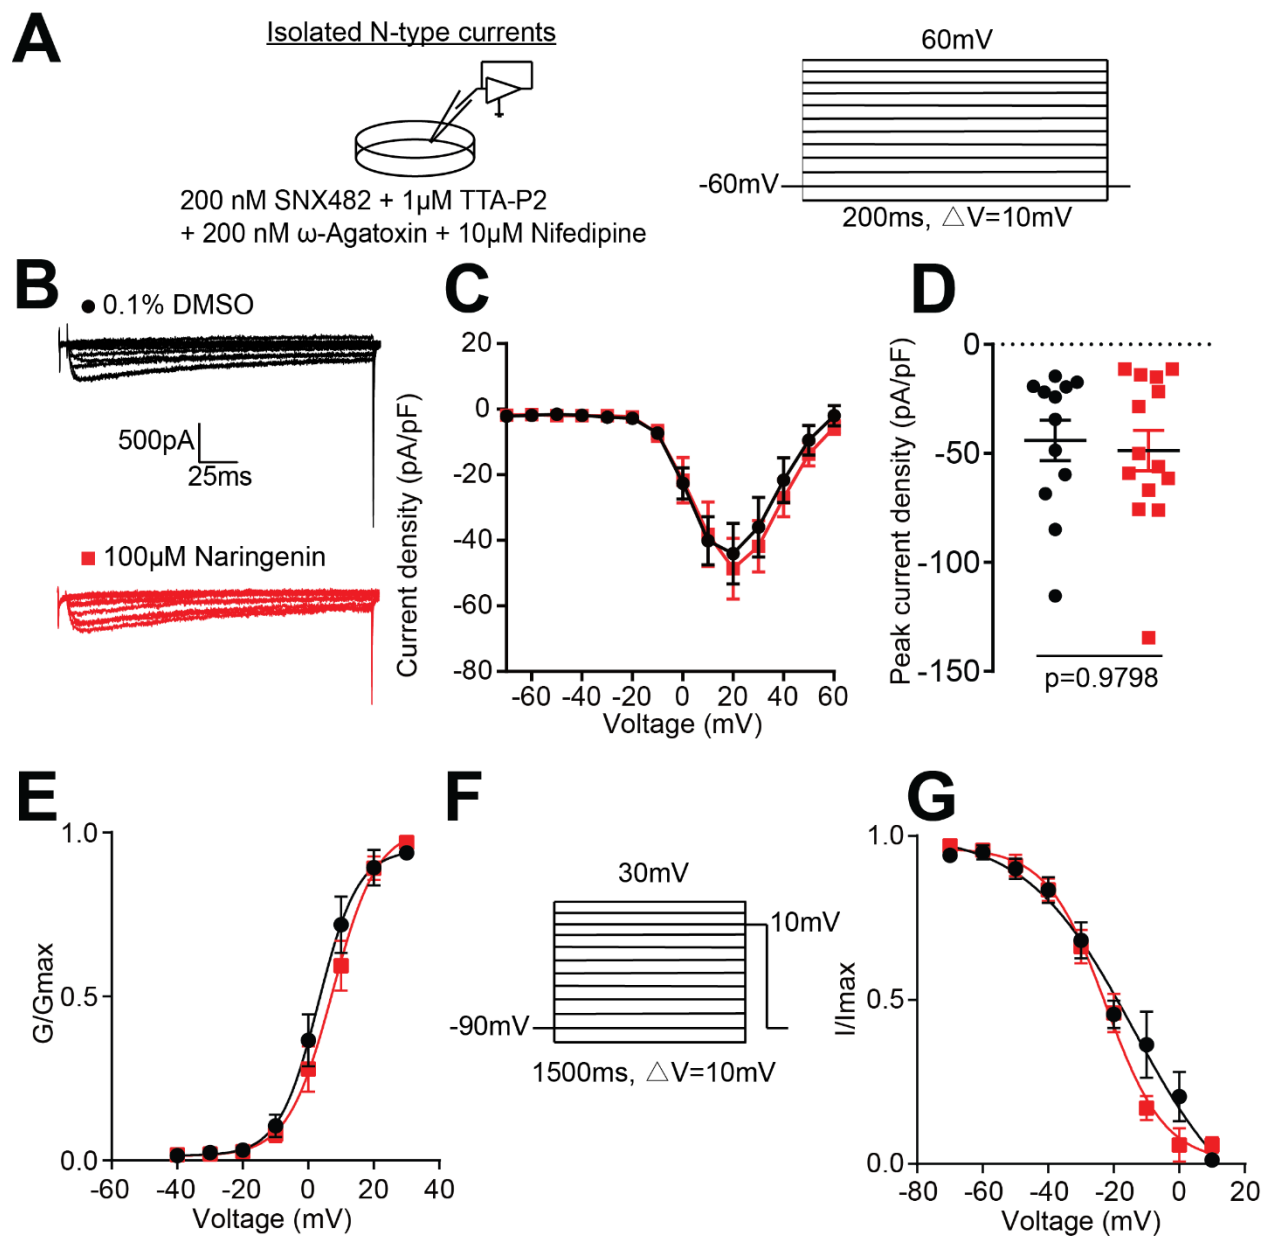

**Supplementary Figure 3. Naringenin does not inhibit N-Type  $\text{Ca}^{2+}$  currents in dorsal root ganglion (DRG) sensory neurons under hyperpolarized and depolarized conditions.**

Representative traces of DRG neuron treated with 0.1% DMSO (control) or 100  $\mu$ M Naringenin under hyperpolarized (A) and depolarized (C) conditions. Peak N-Type  $\text{Ca}^{2+}$  current density at +10 mV (mean  $\pm$  SEM) from DRG sensory neurons under hyperpolarized (B) and depolarized (D) conditions. No statistical significance was observed compared with cells treated with 0.1% DMSO ( $p>0.05$  as noted, Mann-Whitney,  $n=8-12$  cells per condition).

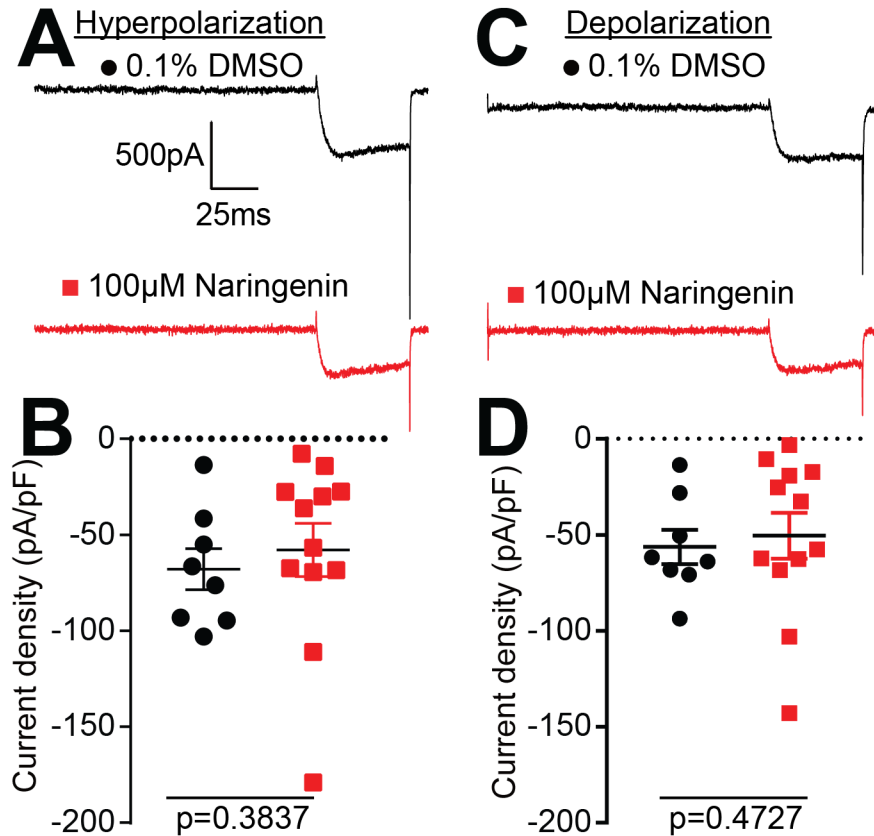

**Supplementary Figure 4. N-Type (CaV2.2)  $\text{Ca}^{2+}$  currents in dorsal root ganglion (DRG) sensory neurons are not affected by Naringenin.** (A) Currents were isolated following the indicated protocol. (B) Representative traces of N-Type  $\text{Ca}^{2+}$  currents from DRG sensory neurons treated with 0.1% DMSO (control) or 100  $\mu\text{M}$  Naringenin. Summary of the normalized (pA/pF) N-Type calcium current density versus voltage relationship (C) and peak N-Type  $\text{Ca}^{2+}$  current density at +20 mV (mean  $\pm$  SEM) (D) from DRG sensory neurons treated as indicated. Boltzmann fits for normalized conductance  $G/G_{\text{max}}$  voltage relations for voltage dependent activation (E) and using the voltage protocol in (F), inactivation (G) of sensory neurons treated as indicated.  $V_{0.5}$  values for activation and inactivation are presented in Table 1. No statistical significance was detected compared with cells treated with 0.1% DMSO ( $p > 0.05$ , Mann-Whitney,  $n = 12-14$  cells per condition).

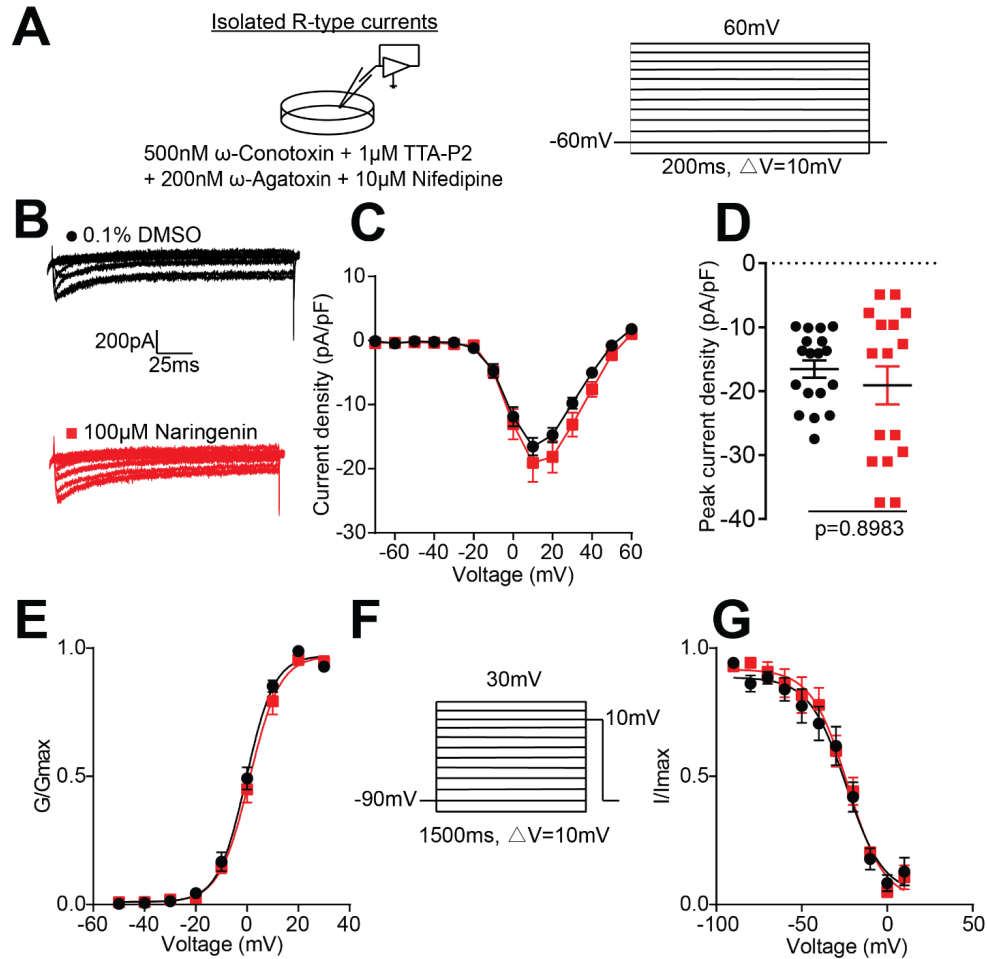

### Supplementary

**Figure 5. R-Type (CaV2.3)  $\text{Ca}^{2+}$  currents in dorsal root ganglion (DRG) sensory neurons are not affected by Naringenin.** (A) Currents were isolated following the indicated protocol. (B) Representative traces of R-Type  $\text{Ca}^{2+}$  currents from DRG sensory neurons treated with 0.1% DMSO (control) or 100  $\mu$ M Naringenin. Summary of the normalized (pA/pF) R-Type calcium current density versus voltage relationship (C) and peak R-Type  $\text{Ca}^{2+}$  current density at +20 mV (mean  $\pm$  SEM) (D) from DRG sensory neurons treated as indicated. Boltzmann fits for normalized conductance  $G/G_{\text{max}}$  voltage relations for voltage dependent activation (E) and using the voltage protocol in (F), inactivation (G) of sensory neurons treated as indicated.  $V_{0.5}$  values for activation and inactivation are presented in Table 1. No statistical significance was detected compared with cells treated with 0.1% DMSO ( $p>0.05$ , Mann-Whitney,  $n=16-18$  cells per condition).

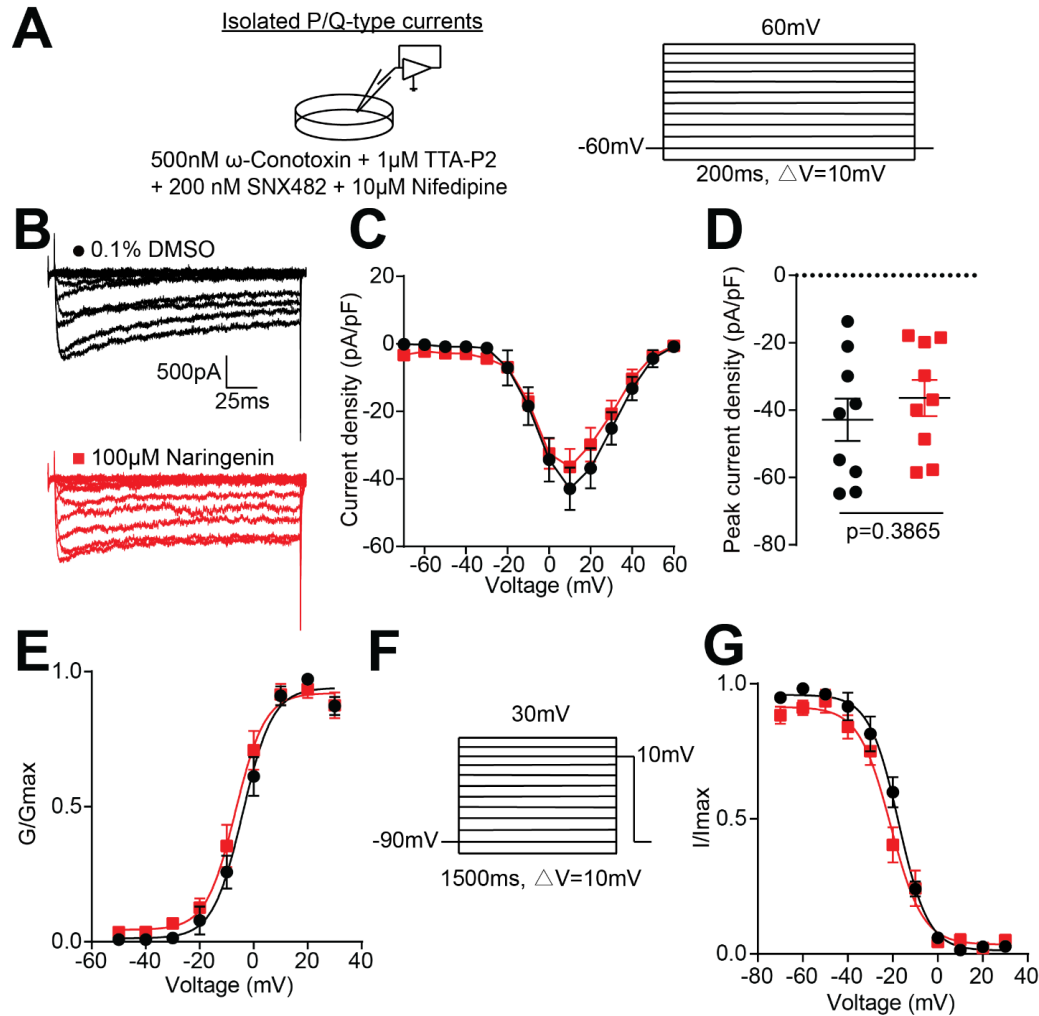

**Supplementary Figure 6. P/Q-Type (CaV2.1)  $\text{Ca}^{2+}$  currents in dorsal root ganglion (DRG) sensory neurons are not affected by Naringenin.** (A) Currents were isolated following the indicated protocol. (B) Representative traces of P/Q-Type  $\text{Ca}^{2+}$  currents from DRG sensory neurons treated with 0.1% DMSO (control) or 100  $\mu\text{M}$  Naringenin. Summary of the normalized (pA/pF) P/Q-Type calcium current density versus voltage relationship (C) and peak P/Q-Type  $\text{Ca}^{2+}$  current density at +20 mV (mean  $\pm$  SEM) (D) from DRG sensory neurons treated as indicated. Boltzmann fits for normalized conductance  $G/G_{\text{max}}$  voltage relations for voltage dependent activation (E) and using the voltage protocol in (F), inactivation (G) of sensory neurons treated as indicated.  $V_{0.5}$  values for activation and inactivation are presented in Table 1. No statistical significance was detected compared with cells treated with 0.1% DMSO ( $p>0.05$ , Mann-Whitney,  $n=9$  cells per condition).

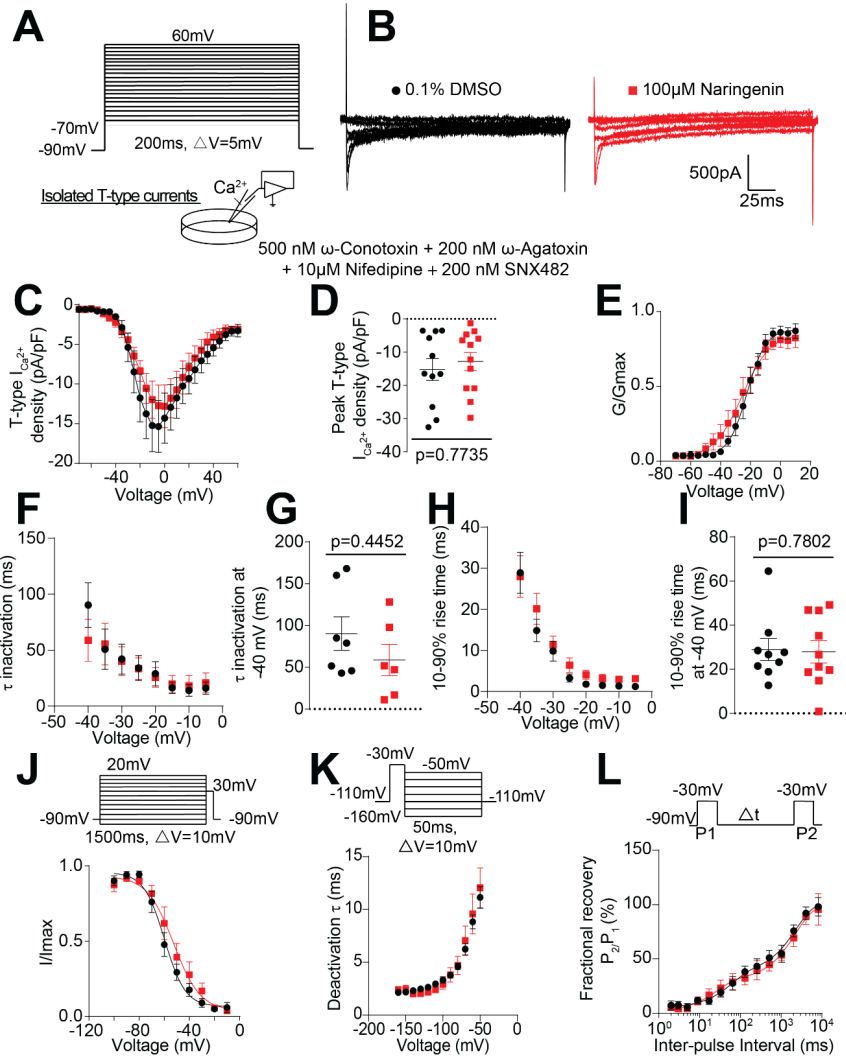

**Supplementary Figure 7. Naringenin does not affect T-Type  $\text{Ca}^{2+}$  currents in dorsal root ganglion (DRG) sensory neurons.** (A) Representative family of traces of T-Type  $\text{Ca}^{2+}$  currents from DRG sensory neurons treated with 0.1% DMSO (control) or 100  $\mu\text{M}$  Naringenin. Voltage protocol used to evoke the currents is shown above the traces. Summary of the normalized (pA/pF) T-Type calcium current density versus voltage relationship (B) and peak T-Type  $\text{Ca}^{2+}$  current density at -10 mV (mean  $\pm$  SEM) (C) from DRG sensory neurons treated as indicated. Inactivation  $\tau$  (single-exponential fit of decaying portion of the current waveforms using a single-exponential equation:  $y = A_1 \times e^{(-x/\tau_1)} + y_0$ , where  $A_1$  is the amplitude,  $\tau_1$  is the decay constant, and  $y_0$  is the offset; D) and time-dependent activation (10-90% rise time; E) from I-V curves in DRG cells shown in B over the range of test potentials from -40 to -10 mV. Boltzmann fits for normalized conductance  $G/G_{\text{max}}$  voltage relations for voltage dependent activation (F) and inactivation (G) of sensory neurons treated as indicated.  $V_{0.5}$  values for activation and inactivation are presented in Table 1. (H) Deactivating tail currents in DMSO or 100  $\mu\text{M}$  Naringenin were fit with a single-exponential function. The resulting  $\tau$  values are plotted. (I) Recovery from inactivation in both DMSO and 100  $\mu\text{M}$  Naringenin groups. Data are averaged and fitted by double exponential association ( $p > 0.05$ , Mann-Whitney,  $n = 9-10$  cells per condition).
